# Supplementary material for: Contrasting Host-Parasite Population Structure: Morphology and Mitogenomics of a Parasitic Flatworm on Pelagic Deepwater Cichlid Fishes from Lake Tanganyika
Source: MDPI journal article supplement (doi:10.3390/biology10080797), 2021-08-18
Supplement: s1 [file s1]

**Table S1:** Measurements of *Cichlidogyrus casuarinus* from Mpulungu, Zambia collected from *Hemibates stenosoma* and *Bathybates graueri*, respectively (a – mean value±standard deviation, b – range).

| Parameters (μm)                 | <i>C. casuarinus</i> ex <i>H. stenosoma</i>               | <i>C. casuarinus</i> ex <i>B. graueri</i> |
|---------------------------------|-----------------------------------------------------------|-------------------------------------------|
| <b>Ventral anchor</b>           |                                                           |                                           |
| Total length                    | 52.3 <sup>a</sup> ±2.1 (48.5 – 52.3) <sup>b</sup> ; n= 37 | 50.1 (46.7 – 51.7); n=4                   |
| Length to notch                 | 43.8±2.4 (38.8 – 47.4); n=37                              | 42.9 (40.8 – 47.2); n=4                   |
| Inner root length               | 15.4±2.8 (11.2 – 23.3); n=37                              | 42.9 (40.8 – 47.2); n=4                   |
| Outer root length               | 7.8±2.0 (4.7 – 12.1); n=36                                | 9.8 (5.4 – 12.1); n=4                     |
| Point length                    | 14.4±2.0 (11.9 – 16.6); n=36                              | 15.1 (13.7 – 17.6); n=4                   |
| <b>Dorsal anchor</b>            |                                                           |                                           |
| Total length                    | 58.0±2.1 (53.8 – 62.2); n=34                              | 59.5 (55.3 – 63.5); n=4                   |
| Length to notch                 | 41.0±3.1 (32.4 – 48.5); n=34                              | 42.0 (38.8 – 44.8); n=4                   |
| Inner root length               | 21.8±3.1 (15.0 – 26.1); n=35                              | 22.2 (17.2 – 25.1); n=4                   |
| Outer root length               | 7.7±1.9 (4.0 – 11.7); n=34                                | 8.2 (7.5 – 8.9); n=4                      |
| Point length                    | 13.2±1.2 (10.6 – 15.6); n=33                              | 12.2 (10.5 – 14.1); n=4                   |
| <b>Ventral bar</b>              |                                                           |                                           |
| Branch length                   | 63.5±7.1 (44.7 – 78.5); n=37                              | 69.8 (65.3 – 73.6); n=4                   |
| Branch maximum width            | 8.6±1.2 (6.7 – 11.7); n=37                                | 8.6 (7.6 – 9.6); n=4                      |
| <b>Dorsal bar</b>               |                                                           |                                           |
| Maximum straight width          | 79.4±8.1 (64.8 – 98.4); n=36                              | 89.4 (77.8 – 94.6); n=4                   |
| Thickness at midlength          | 14.0±2.1 (10.6 – 18.7); n=37                              | 16.3 (14.0 – 17.8); n=4                   |
| Distance between auricles       | 29.7±5.1 (18.0 – 38.9); n=37                              | 37.1 (32.7 – 40.7); n=4                   |
| Auricle length                  | 16.2±2.4 (12.6 – 22.6); n=38                              | 18.9 (15.9 – 20.1); n=4                   |
| <b>Hooks</b>                    |                                                           |                                           |
| Pair I                          | 33.6±3.0 (25.8 – 42.2); n=36                              | 34.3 (31.9 – 35.5); n=4                   |
| Pair II                         | 23.0±1.7 (19.5 – 26.7); n=33                              | 24.2 (23.1 – 26.4); n=4                   |
| Pair III                        | 23.8±1.7 (20.7 – 27.7); n=33                              | 24.8 (24.4 – 25.6); n=4                   |
| Pair IV                         | 25.0±1.9 (22.1 – 29.1); n=34                              | 26.2 (22.8 – 28.1); n=4                   |
| Pair V                          | 11.0±1.2 (9.0 – 13.0); n=22                               | 10.6 (9.1 – 11.4); n=4                    |
| Pair VI                         | 26.6±2.2 (22.1 – 31.1); n=36                              | 27.1 (25.5 – 28.5); n=4                   |
| Pair VII                        | 27.3±2.2 (23.6 – 32.6); n=32                              | 30.1 (28.4 – 32.7); n=4                   |
| Copulatory tube straight length | 35.2±1.8 (30.8 – 30.3); n=36                              | 36.8 (32.1 – 39.9); n=5                   |
| Accessory piece curved length   | 34.1±5.3 (22.0 – 43.0); n=21                              | 33.1 (31.0 – 36.7); n=4                   |
| Heel straight length            | 53.1±7.7 (37.7 – 74.1); n=36                              | 74.1 (63.4 – 89.9); n=4                   |

**Table S2:** Overview of the length (in bp) of rDNA regions in the partly assembled ribosomal operon of *Cichlidogyrus casuarinus* based on a pooled sample of 80 individuals (GenBank accession number MZ700354).

| Region | Position    | Length |
|--------|-------------|--------|
| SSU    | 1 – 1974    | 1974   |
| ITS1   | 1975– 2457  | 482    |
| 5.8    | 2458 – 2614 | 156    |
| ITS2   | 2615 – 3129 | 514    |
| LSU    | 3130– 7014  | 3884   |

**Table S3:** Overview of the allele frequencies recovered from different datasets in the analysed fragment of *cox1* gene (392 bp).

| Position | Individual-based sequences from Mpulungu, September 2018 |         |         |         | Individual-based sequencing of <i>C. casuarinus</i> available |         |         |         | Pooled NGS dataset from Mpulungu, September 2018 |         |         |         |
|----------|----------------------------------------------------------|---------|---------|---------|---------------------------------------------------------------|---------|---------|---------|--------------------------------------------------|---------|---------|---------|
|          | A                                                        | T       | C       | G       | A                                                             | T       | C       | G       | A                                                | T       | C       | G       |
| 1        | 0.83333                                                  | 0       | 0.16667 | 0       | 0.94118                                                       | 0       | 0.05882 | 0       | NA                                               | NA      | NA      | NA      |
| 2        | NA                                                       | NA      | NA      | NA      | 0                                                             | 0.76471 | 0.23529 | 0       | NA                                               | NA      | NA      | NA      |
| 5        | NA                                                       | NA      | NA      | NA      | 0.23529                                                       | 0.76471 | 0       | 0       | NA                                               | NA      | NA      | NA      |
| 11       | 0                                                        | 0.54167 | 0.375   | 0.08333 | 0                                                             | 0.57353 | 0.39706 | 0.02941 | 0                                                | 0.03272 | 0.96728 | 0       |
| 14       | 0                                                        | 0.58333 | 0.41667 | 0       | 0                                                             | 0.58824 | 0.41176 | 0       | NA                                               | NA      | NA      | NA      |
| 17       | 0.20833                                                  | 0.79167 | 0       | 0       | 0.10294                                                       | 0.89706 | 0       | 0       | 0.04410                                          | 0.95590 | 0       | 0       |
| 20       | 0                                                        | 0.41667 | 0.58333 | 0       | 0                                                             | 0.39706 | 0.60294 | 0       | 0                                                | 0.45170 | 0.54830 | 0       |
| 23       | 0.95833                                                  | 0       | 0.04167 | 0       | 0.98529                                                       | 0       | 0.01471 | 0       | NA                                               | NA      | NA      | NA      |
| 24       | 0                                                        | 0.95833 | 0.04167 | 0       | 0                                                             | 0.98529 | 0.01471 | 0       | NA                                               | NA      | NA      | NA      |
| 26       | 0.37500                                                  | 0       | 0       | 0.625   | 0.33824                                                       | 0       | 0       | 0.66176 | 0.38401                                          | 0       | 0       | 0.61599 |
| 32       | NA                                                       | NA      | NA      | NA      | 0.01471                                                       | 0.95588 | 0.02941 | 0       | 0                                                | 0.95670 | 0.01083 | 0.03248 |
| 41       | NA                                                       | NA      | NA      | NA      | 0                                                             | 0.01471 | 0       | 0.98529 | 0                                                | 0.01060 | 0       | 0.98940 |
| 47       | NA                                                       | NA      | NA      | NA      | 0                                                             | 0.01471 | 0.98529 | 0       | 0                                                | 0.03748 | 0.96252 | 0       |
| 50       | NA                                                       | NA      | NA      | NA      | 0                                                             | 0.01471 | 0.98529 | 0       | NA                                               | NA      | NA      | NA      |
| 62       | NA                                                       | NA      | NA      | NA      | 0                                                             | 0.01471 | 0.98529 | 0       | NA                                               | NA      | NA      | NA      |
| 68       | 0.95833                                                  | 0.04167 | 0       | 0       | 0.98529                                                       | 0.01471 | 0       | 0       | NA                                               | NA      | NA      | NA      |
| 74       | NA                                                       | NA      | NA      | NA      | NA                                                            | NA      | NA      | NA      | 0                                                | 0.98780 | 0.01220 | 0       |
| 80       | NA                                                       | NA      | NA      | NA      | 0.01471                                                       | 0       | 0       | 0.98529 | 0.01648                                          | 0       | 0       | 0.98352 |
| 92       | 0                                                        | 0.45833 | 0.54167 | 0       | 0                                                             | 0.44118 | 0.55882 | 0       | 0                                                | 0.51558 | 0.48442 | 0       |
| 93       | NA                                                       | NA      | NA      | NA      | 0                                                             | 0.02941 | 0.97059 | 0       | NA                                               | NA      | NA      | NA      |
| 98       | NA                                                       | NA      | NA      | NA      | 0                                                             | 0.98529 | 0.01471 | 0       | NA                                               | NA      | NA      | NA      |
| 102      | NA                                                       | NA      | NA      | NA      | NA                                                            | NA      | NA      | NA      | 0.01801                                          | 0       | 0       | 0.98199 |
| 110      | NA                                                       | NA      | NA      | NA      | 0                                                             | 0.01471 | 0.98529 | 0       | 0                                                | 0.02710 | 0.97290 | 0       |
| 114      | 0                                                        | 0.95833 | 0       | 0.04167 | 0                                                             | 0       | 0.98529 | 0.01471 | NA                                               | NA      | NA      | NA      |

|     |         |         |          |         |          |         |         |         |         |         |         |         |
|-----|---------|---------|----------|---------|----------|---------|---------|---------|---------|---------|---------|---------|
| 118 | NA      | NA      | NA       | NA      | NA       | NA      | NA      | NA      | 0       | 0.00270 | 0.99730 | 0       |
| 119 | 0.95833 | 0.04167 | 0        | 0       | 0.98529  | 0.01471 | 0       | 0       | 0.98111 | 0.01889 | 0       | 0       |
| 122 | NA      | NA      | NA       | NA      | 0        | 0.98529 | 0.01471 | 0       | NA      | NA      | NA      | NA      |
| 128 | NA      | NA      | NA       | NA      | NA       | NA      | NA      | NA      | 0       | 0.02929 | 0.97071 | 0       |
| 129 | NA      | NA      | NA       | NA      | 0        | 0.98529 | 0.01471 | 0       | NA      | NA      | NA      | NA      |
| 131 | NA      | NA      | NA       | NA      | NA       | NA      | NA      | NA      | 0.01887 | 0       | 0       | 0.98113 |
| 134 | 0       | 0.95833 | 0.041667 | 0       | 0        | 0.98529 | 0.01471 | 0       | NA      | NA      | NA      | NA      |
| 148 | NA      | NA      | NA       | NA      | 0.01471  | 0       | 0.98529 | 0       | 0.00265 | 0       | 0.99735 | 0       |
| 150 | NA      | NA      | NA       | NA      | NA       | NA      | NA      | NA      | 0.00262 | 0       | 0.99738 | 0       |
| 152 | 0       | 0.62500 | 0.375    | 0       | 0        | 0.63235 | 0.36765 | 0       | 0       | 0.54993 | 0.45007 | 0       |
| 155 | 0       | 0.95833 | 0.04167  | 0       | 0        | 0.94118 | 0.05882 | 0       | 0       | 0.91777 | 0.08223 | 0       |
| 161 | NA      | NA      | NA       | NA      | NA       | NA      | NA      | NA      | 0       | 0.99346 | 0.00654 | 0       |
| 167 | NA      | NA      | NA       | NA      | 0.98529  | 0       | 0       | 0.01471 | NA      | NA      | NA      | NA      |
| 176 | NA      | NA      | NA       | NA      | 0        | 0.98529 | 0.01471 | 0       | 0       | 0       | 0       | 0       |
| 185 | NA      | NA      | NA       | NA      | NA       | NA      | NA      | NA      | 0       | 0.98496 | 0.01504 | 0       |
| 186 | NA      | NA      | NA       | NA      | 0.97059  | 0       | 0.02941 | 0       | NA      | NA      | NA      | NA      |
| 187 | NA      | NA      | NA       | NA      | 0.01471  | 0       | 0.98529 | 0       | NA      | NA      | NA      | NA      |
| 191 | NA      | NA      | NA       | NA      | 0        | 0.98529 | 0.01471 | 0       | NA      | NA      | NA      | NA      |
| 194 | 0       | 0.95833 | 0.04167  | 0       | 0        | 0.98529 | 0.01471 | 0       | NA      | NA      | NA      | NA      |
| 200 | 0       | 0.79167 | 0.20833  | 0       | 0        | 0.26471 | 0.73529 | 0       | 0       | 0.22914 | 0.77086 | 0       |
| 202 | NA      | NA      | NA       | NA      | 0        | 0.01471 | 0.98529 | 0       | NA      | NA      | NA      | NA      |
| 203 | 0.625   | 0.375   | 0        | 0       | 0.67647  | 0.30882 | 0.01471 | 0       | 0.59141 | 0.40859 | 0       | 0       |
| 206 | NA      | NA      | NA       | NA      | 0.014706 | 0       | 0       | 0.98529 | 0       | 0.00240 | 0       | 0.99760 |
| 218 | NA      | NA      | NA       | NA      | 0        | 0.01471 | 0.98529 | 0       | NA      | NA      | NA      | NA      |
| 233 | NA      | NA      | NA       | NA      | NA       | NA      | NA      | NA      | 0.99269 | 0       | 0       | 0.00731 |
| 254 | 0.04167 | 0       | 0        | 0.95833 | 0.029412 | 0       | 0       | 0.97059 | NA      | NA      | NA      | NA      |
| 257 | 0       | 0.83333 | 0.16667  | 0       | 0        | 0.82353 | 0.17647 | 0       | 0       | 0.86510 | 0.13490 | 0       |
| 265 | NA      | NA      | NA       | NA      | NA       | NA      | NA      | NA      | 0       | 0.00247 | 0.99753 | 0       |

|     |         |         |          |         |         |          |         |         |         |         |         |         |
|-----|---------|---------|----------|---------|---------|----------|---------|---------|---------|---------|---------|---------|
| 266 | 0.16667 | 0       | 0        | 0.83333 | 0.08824 | 0        | 0       | 0.91176 | 0.04074 | 0.01605 | 0       | 0.94321 |
| 269 | NA      | NA      | NA       | NA      | 0.02941 | 0.97059  | 0       | 0       | NA      | NA      | NA      | NA      |
| 274 | NA      | NA      | NA       | NA      | 0.98529 | 0.01471  | 0       | 0       | NA      | NA      | NA      | NA      |
| 281 | NA      | NA      | NA       | NA      | NA      | NA       | NA      | NA      | 0.98422 | 0       | 0       | 0.01578 |
| 283 | NA      | NA      | NA       | NA      | NA      | NA       | NA      | NA      | 0       | 0.00243 | 0       | 0.99757 |
| 284 | 0.95833 | 0       | 0        | 0.04167 | 0.97059 | 0        | 0       | 0.02941 | 0.97800 | 0       | 0       | 0.02200 |
| 293 | NA      | NA      | NA       | NA      | NA      | NA       | NA      | NA      | 0       | 0.02303 | 0       | 0.97697 |
| 299 | NA      | NA      | NA       | NA      | NA      | NA       | NA      | NA      | 0.01613 | 0       | 0       | 0.98387 |
| 302 | 0.91667 | 0       | 0        | 0.08333 | 0.95588 | 0        | 0       | 0.04412 | 0.96500 | 0       | 0       | 0.03500 |
| 305 | NA      | NA      | NA       | NA      | 0.01471 | 0        | 0       | 0.98529 | NA      | NA      | NA      | NA      |
| 308 | NA      | NA      | NA       | NA      | NA      | NA       | NA      | NA      | 0       | 0.98642 | 0.01358 | 0       |
| 313 | NA      | NA      | NA       | NA      | NA      | NA       | NA      | NA      | 0.00244 | 0       | 0.99756 | 0       |
| 317 | 0       | 0.95833 | 0.04167  | 0       | 0       | 0.073523 | 0.92647 | 0       | 0       | 0.05897 | 0.94103 | 0       |
| 334 | NA      | NA      | NA       | NA      | NA      | NA       | NA      | NA      | 0       | 0.99006 | 0       | 0.00994 |
| 338 | 0       | 0.95833 | 0.04167  | 0       | 0       | 0.95588  | 0.04412 | 0       | 0       | 0.97146 | 0.01117 | 0.01737 |
| 342 | 0       | 0.04167 | 0        | 0.95833 | 0       | 0.01471  | 0       | 0.98529 | NA      | NA      | NA      | NA      |
| 344 | NA      | NA      | NA       | NA      | 0       | 0.01471  | 0.98529 | 0       | 0       | 0.01363 | 0.98637 | 0       |
| 347 | NA      | NA      | NA       | NA      | NA      | NA       | NA      | NA      | 0.97767 | 0       | 0       | 0.02233 |
| 348 | NA      | NA      | NA       | NA      | 0       | 0.98529  | 0.01471 | 0       | NA      | NA      | NA      | NA      |
| 350 | NA      | NA      | NA       | NA      | NA      | NA       | NA      | NA      | 0       | 0.99009 | 0.00991 | 0       |
| 356 | 0.04167 | 0.04167 | 0        | 0.91667 | 0.01471 | 0.01471  | 0       | 0.97059 | NA      | NA      | NA      | NA      |
| 357 | 0       | 0.54167 | 0.45833  | 0       | 0       | 0.39706  | 0.60294 | 0       | 0       | 0.42428 | 0.57572 | 0       |
| 359 | 0.95833 | 0       | 0.041667 | 0       | 0.98529 | 0        | 0.01471 | 0       | NA      | NA      | NA      | NA      |
| 362 | 0       | 0.04167 | 0.95833  | 0       | 0       | 0.01471  | 0.98529 | 0       | 0.00503 | 0.01887 | 0.97610 | 0       |
| 365 | 0       | 0.04167 | 0.95833  | 0       | 0       | 0.02941  | 0.97059 | 0       | 0       | 0.01880 | 0.98120 | 0       |
| 377 | 0       | 0.41667 | 0.58333  | 0       | 0       | 0.41176  | 0.58824 | 0       | 0       | 0.42522 | 0.57478 | 0       |
| 379 | 0.04167 | 0       | 0        | 0.95833 | 0.01471 | 0        | 0       | 0.98529 | NA      | NA      | NA      | NA      |
| 381 | NA      | NA      | NA       | NA      | NA      | NA       | NA      | NA      | 0.00247 | 0       | 0.99753 | 0       |

|            |    |    |    |    |         |         |         |         |    |         |         |    |
|------------|----|----|----|----|---------|---------|---------|---------|----|---------|---------|----|
| <b>383</b> | NA | NA | NA | NA | 0.01471 | 0.01471 | 0.97059 | 0       | 0  | 0.03453 | 0.96547 | 0  |
| <b>383</b> | NA | NA | NA | NA | 0       | 0.98529 | 0.01471 | 0       | NA | NA      | NA      | NA |
| <b>386</b> | NA | NA | NA | NA | 0       | 0.01471 | 0       | 0.98529 | NA | NA      | NA      | NA |
| <b>389</b> | NA | NA | NA | NA | 0       | 0.01471 | 0.98529 | 0       | 0  | 0.00498 | 0.99502 | 0  |
| <b>392</b> | NA | NA | NA | NA | 0       | 0.98529 | 0.01471 | 0       | 0  | 0.99499 | 0.00501 | 0  |

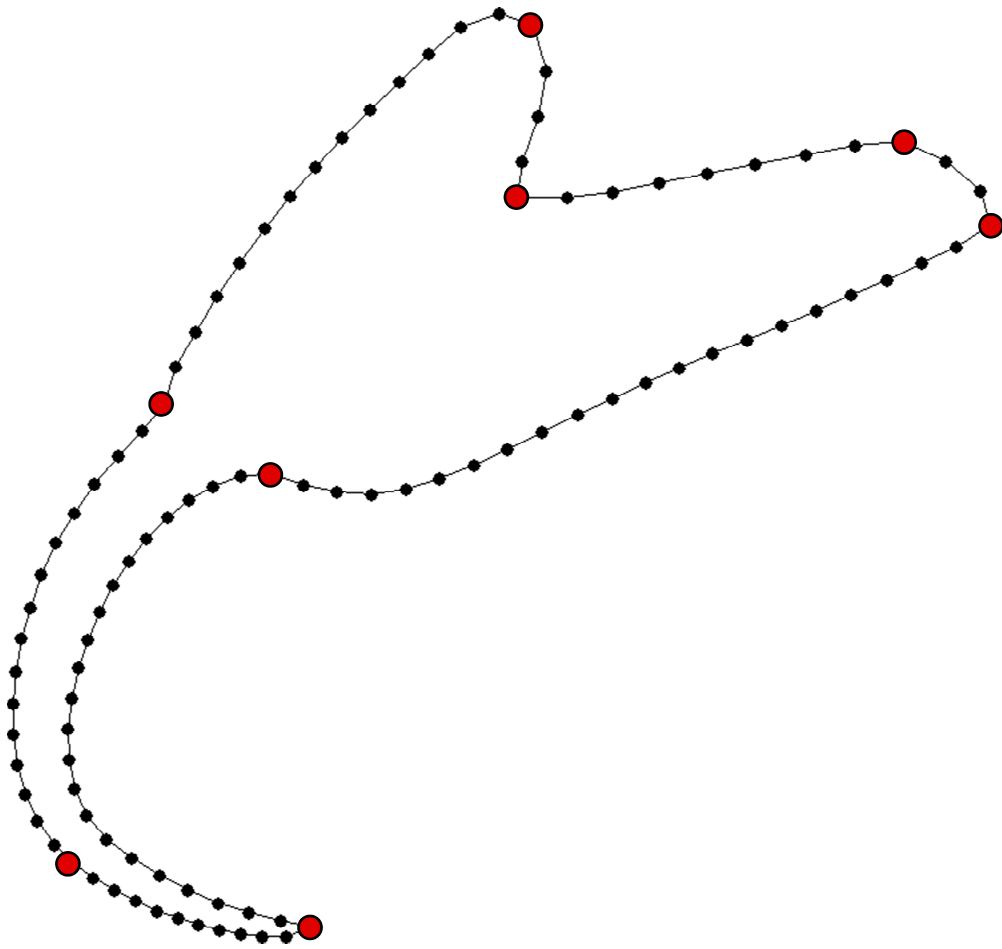

**Fig. S1:** Position of fixed landmarks (big points) as well as semi-landmarks (small points) on the dorsal anchor of *Cichlidogyrus casuarinus*. Number and position of landmarks was followed in the analyses of the ventral anchor.
